# Supplementary material for: The Effect of Algicidal and Denitrifying Bacteria on the Vertical Distribution of Cyanobacteria and Nutrients
Source: MDPI journal article supplement (doi:10.3390/w14132129), 2022-07-04
Supplement: s1 [file s1]

Archive with 1 entries (1 files):
- water-1757300-supplementary.pdf
