# Supplementary material for: The Effect of Algicidal and Denitrifying Bacteria on the Vertical Distribution of Cyanobacteria and Nutrients
Source: MDPI journal article supplement (doi:10.3390/w14132129), 2022-07-04
Supplement: s1 [file s1 › water-1757300-supplementary.pdf]

## Supplementary Material

**Table S1.** Algicidal effects of bacterial LB cultures and cell-free filtrates against unicellular *M. aeruginosa*

| Algicidal bacteria                         | inoculum level | Inhibitory rate after 5 days (%) |
|--------------------------------------------|----------------|----------------------------------|
| <i>B. diminuta</i> Z1 cultures             | 10%            | 91.41±1.67%                      |
| <i>B. diminuta</i> Z1 cell-free filtrates  | 10%            | 73.49±0.58%                      |
| <i>P. stutzeri</i> ZJ4 cultures            | 10%            | 85.63±2.01%                      |
| <i>P. stutzeri</i> ZJ4 cell-free filtrates | 10%            | 71.31±1.83%                      |

Note: Initial concentration of unicellular *M. aeruginosa* (FACHB 912) was  $1.61 \times 10^6$  Cells/ml. Bacteria was cultured in LB medium for 24h.
